# Supplementary material
Source: Springer Nature journal article supplement (https://www.springermedizin.de/resource/supplementary/12906_2013_2139_MOESM14_ESM.pdf/9522136)
Supplement: MOESM14 [file 9522136]

Glycerid Heamoglobin (A1c) (%)

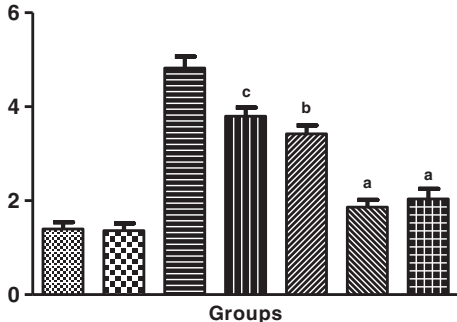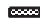

Normal Control

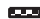

Normal Control+UFG (40 mg/kg)

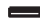

Diabetic Control

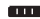

UFG I (10 mg/kg)

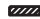

UFG II (20 mg/kg)

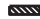

UFG III (40 mg/kg)

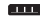

Glibenclamide (10 mg/kg)
